# Supplementary material for: Rapid detection of Salmonella using an aptamer-functionalized PDA liposome sensor with naked-eye colorimetric sensing
Source: Royal Society of Chemistry journal article supplement (doi:10.1039/d3ma00840a), 2024-01-01
Supplement: d3ma00840a1.pdf [file d3ma00840a1.pdf]

## Supplementary material

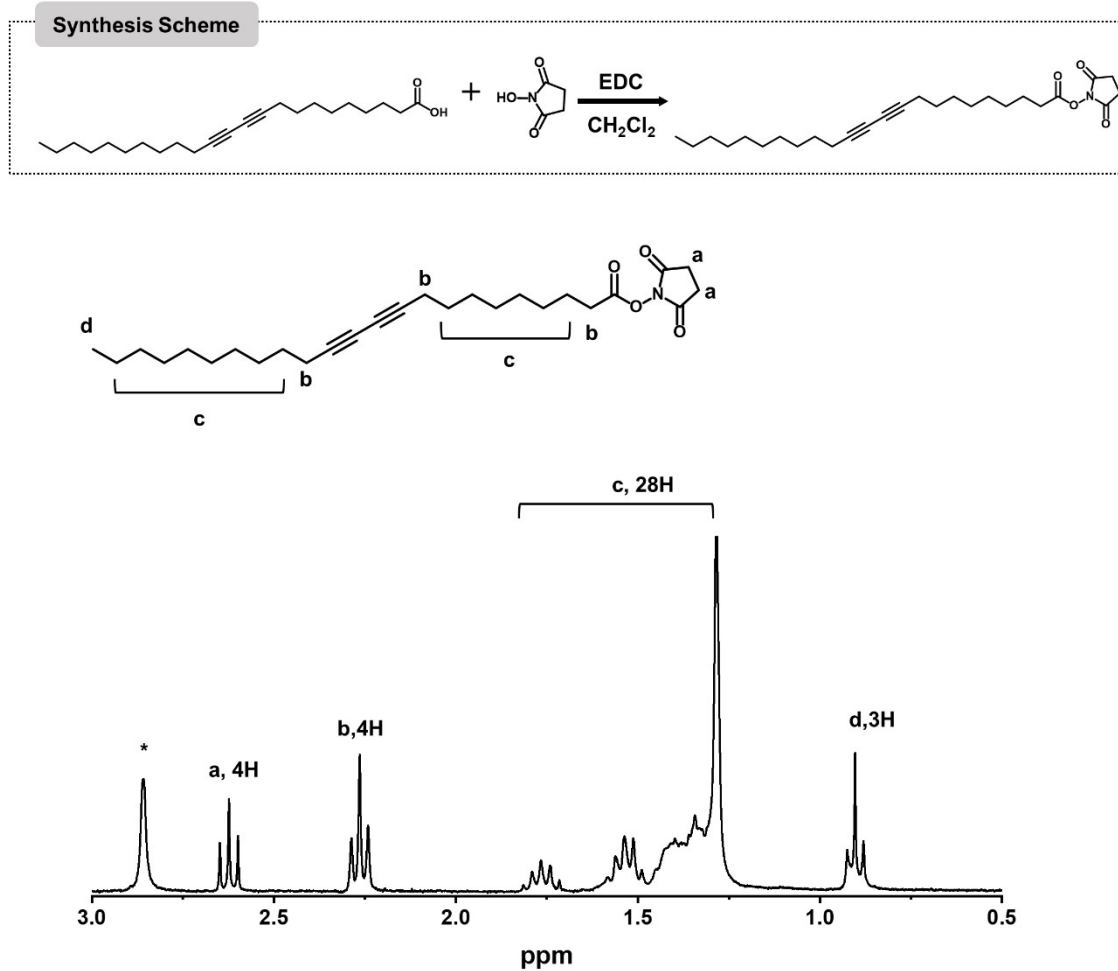

\* :  $^1\text{H}$  peak from N-hydroxysuccinimide

**Fig. S1.** Synthesis scheme of TCDA-NHS and corresponding  $^1\text{H}$  NMR analysis results

| Composition<br>(mole ratio)         | CR (%)<br>70°C@20min | Photo                                                                              | note       |
|-------------------------------------|----------------------|------------------------------------------------------------------------------------|------------|
| PCDA:PCDA-NHS:DMPC<br>(0.9:0.1:0.6) | 20.1%                |  |            |
| TCDA:TCDA-NHS:DMPC<br>(0.9:0.1:0.6) | 37.9%                |  | No aptamer |
| TCDA:TCDA-NHS:DMPC<br>(0.9:0.1:0.3) | 25.2%                |  |            |
| TCDA:TCDA-NHS:DMPE<br>(0.9:0.1:0.6) | 28.0%                |  |            |

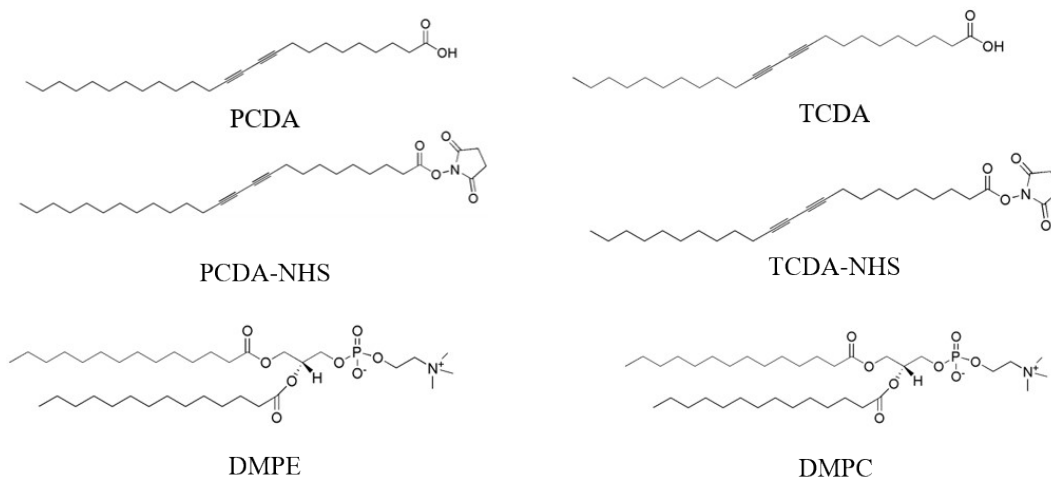

**Table S1.** Heat Stimulated colorimetric response of different liposome composition and chemical structure of each components.

Liposomes of different compositions were prepared by the bath method to the same final concentration of 1 mM, and UV polymerization was performed without aptamer attachment. The sensitivity of each liposomal material was evaluated through a thermal colorimetric response after a 20-minute incubation at 70 °C. The extent of color alteration was quantified as CR (%), and the specific calculation method is explained in the manuscript.

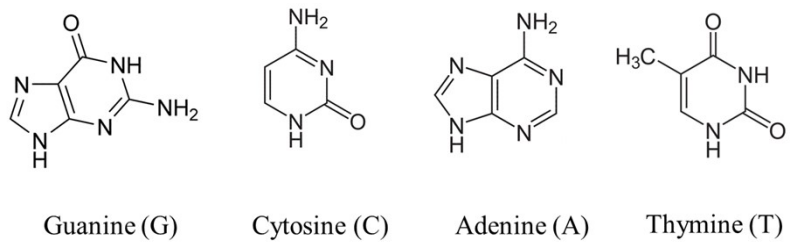

**Fig. S2.** Chemical structure of Guanine, Cytosine, Adenine, and Thymine

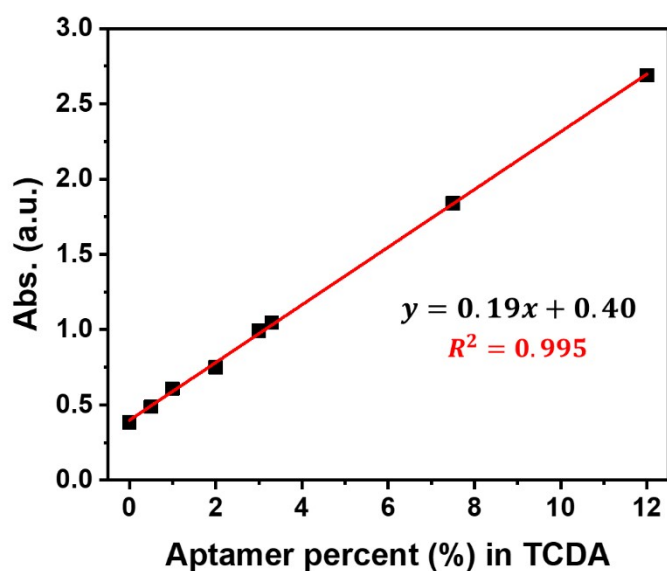

| Abs.<br>(260 nm)                                  | Aptamer feeding concentration (%) |        |        |       |
|---------------------------------------------------|-----------------------------------|--------|--------|-------|
|                                                   | 1                                 | 3      | 7.5    | 12    |
| (a) Aptamer conc.<br>In TCDA liposome<br>solution | 0.6084                            | 0.9810 | 1.8399 | 2.690 |
| (b) After dialysis<br>TCDA liposome solution      | 0.4830                            | 0.7722 | 1.5195 | 2.155 |
| TCDA liposome<br>conjugated aptamer %             | 79.4                              | 78.8   | 82.6   | 80.1  |

**Fig. S3.** To generate a master curve, aptamer conjugation onto TCDA liposomes is performed across different concentrations (1%, 3%, 7.5%, and 12%). Using 100-500 Dalton dialysis membrane tubing, the mixture is subjected to water exchange and stirring over 3 days, ensuring that only TCDA liposomes remain. After verifying the absorbance of the obtained solution through UV-vis spectroscopy, aptamer efficiency is determined by comparing it with the absorbance of the TCDA liposome-aptamer solution.

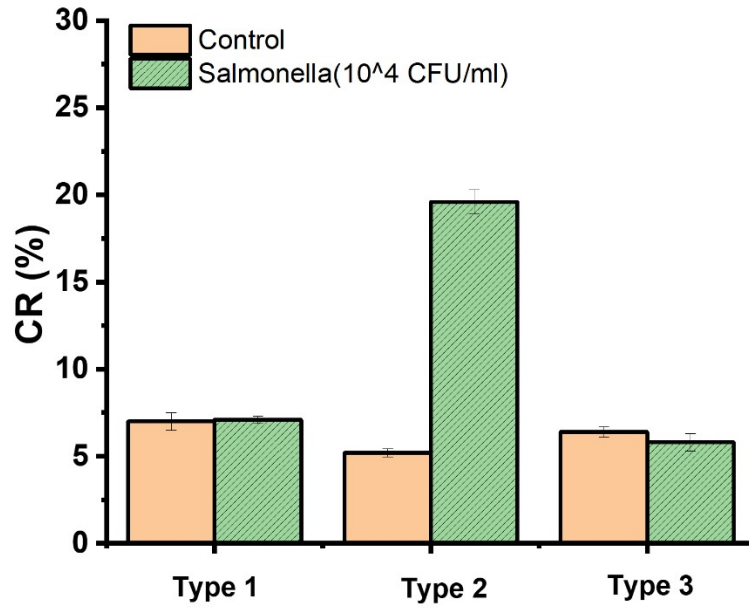

| Sensor | Aptamer                            | Salmonella (CFU/mL) | CR (%) |
|--------|------------------------------------|---------------------|--------|
| Type 1 | No aptamer                         | 0                   | 7.0    |
|        |                                    | 10 <sup>4</sup>     | 7.1    |
| Type 2 | <i>Salmonella</i> Specific aptamer | 0                   | 5.2    |
|        |                                    | 10 <sup>4</sup>     | 19.6   |
| Type 3 | Non-specific aptamer               | 0                   | 6.4    |
|        |                                    | 10 <sup>4</sup>     | 5.8    |

**Fig. S4.** *Salmonella* -specific sensing properties of PDA liposome sensors depending on aptamer type

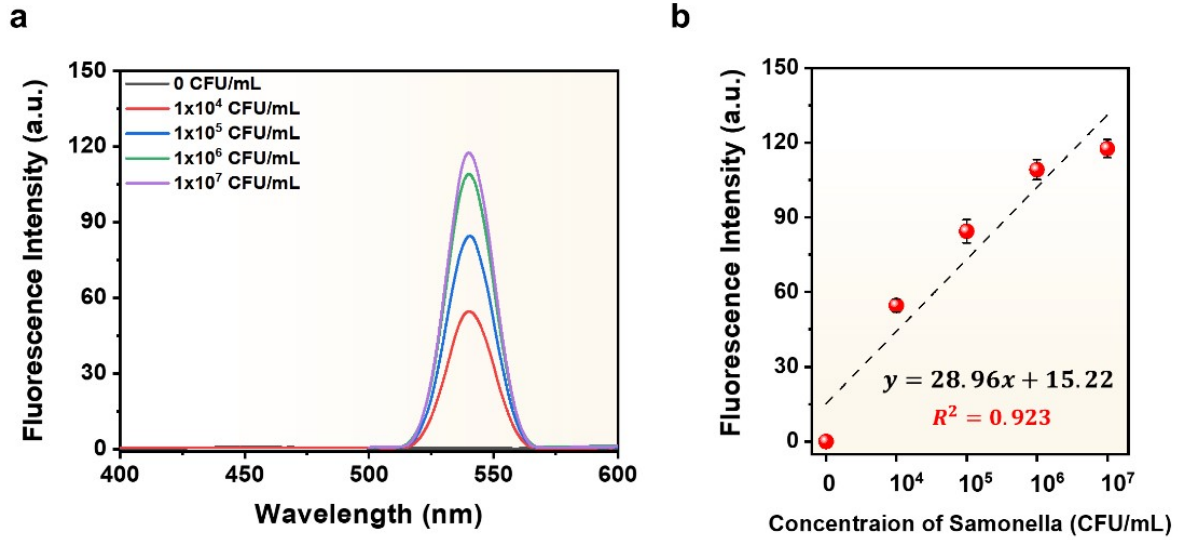

**Fig. S5.** (a) Fluorescence spectra for different *Salmonella* concentrations from  $1 \times 10^4$ ,  $1 \times 10^5$ ,  $1 \times 10^6$ ,  $1 \times 10^7$  CFU/mL in eggs. (b) Calibration curve and linearity results for fluorescence intensity after 15 minutes of exposure to different *Salmonella* concentrations. (ranging from 500 to 600 nm)
